# Supplementary material for: Bioinformatics analysis of Ras homologue enriched in the striatum, a potential target for Huntington's disease therapy
Source: PubMed Central journal article supplement — Int J Mol Med. 2019 Oct 15;44(6):2223–33. doi: 10.3892/ijmm.2019.4373 (PMC6844632; doi:10.3892/ijmm.2019.4373), 2019-10-15
Supplement: Supplementary_Data.pdf [file Supplementary_Data.pdf]

Table S1. SLiMs detected by the ELM resource within RHES regions: (A) N-terminal sequence, (B) Ras domain and (C) C-terminal tail.

| A, N-terminal sequence |                              |           |                                                                                                                                                    |                                                                                                                                                                                                          |                                                 |                         |
|------------------------|------------------------------|-----------|----------------------------------------------------------------------------------------------------------------------------------------------------|----------------------------------------------------------------------------------------------------------------------------------------------------------------------------------------------------------|-------------------------------------------------|-------------------------|
| Elm motif name         | Instances (Matched Sequence) | Positions | Elm description                                                                                                                                    | Cell compartment                                                                                                                                                                                         | Pattern                                         | E-value                 |
| MOD_NEK2_1             | MMKTLS                       | 1-6       | NEK2 phosphorylation motif with preferred Phe, Leu or Met in the -3 position to compensate for less favourable residues in the +1 and +2 position. | Nucleus, Cytosol, Centrosome, Ndc80 complex, Condensed nuclear chromosome outer kinetochore                                                                                                              | [FLM][^P][^P]((ST))[^DEP][^DE]                  | 9.798x10 <sup>-03</sup> |
| MOD_GSK3_1             | TLSSGNCT                     | 4-11      | GSK3 phosphorylation recognition site                                                                                                              | Cytosol, nucleus                                                                                                                                                                                         | ...(ST)...[ST]                                  | 2.679x10 <sup>-02</sup> |
| MOD_Plk_1              | GNCTLSV                      | 8-14      | Ser/Thr residue phosphorylated by the Plk1 kinase                                                                                                  | Centralspindlin complex, Nucleus, Spindle, Gamma-tubulin complex, Midbody, Cytosol, Kinetochore, Spindle midzone, Nuclear condensin complex, Cleavage furrow, Nucleoplasm, Microtubule organizing center | [DNE][^PG][ST]((FYILMVV[.]) (^PEDGKN) FWYLIVM)) | 7.674x10 <sup>-03</sup> |
| LIG_FHA_1              | NCTLSVP                      | 9-15      | Phosphothreonine motif binding a subset of FHA domains that show a preference for a large aliphatic amino acid at the pT+3 position.               | Nucleus                                                                                                                                                                                                  | ..(T).[ILV].                                    | 8.662x10 <sup>-03</sup> |
| DOC_PP2B_LxvP_1        | LSVP                         | 12-15     | Docking motif in calcineurin substrates that binds at the interface of the catalytic CNA and regulatory CNB subunits.                              | Cytosol, Calcineurin complex, Nucleus                                                                                                                                                                    | L.[LLIVAPM]P                                    | 2.296x10 <sup>-03</sup> |

Table SI. Continued.

| Elm name           | Positions                                                  | Elm description                                                                                                                                    | Cell compartment                                                                                                                                               | Pattern                                                                                                 |
|--------------------|------------------------------------------------------------|----------------------------------------------------------------------------------------------------------------------------------------------------|----------------------------------------------------------------------------------------------------------------------------------------------------------------|---------------------------------------------------------------------------------------------------------|
| DOC_USP7_MATH_1    | 16-20                                                      | The USP7 MATH domain binding motif variant based on the MDM2 and p53 interactions.                                                                 | Nucleus                                                                                                                                                        | [PA][^P][^FYWIL]S[^P]                                                                                   |
| LIG_LIR_Gen_1      | 19-23<br>92-97<br>104-109<br>105-109<br>180-186<br>181-186 | Canonical LIR motif that binds to Atg8 protein family members to mediate processes involved in autophagy.                                          | Cytosol,<br>Cytoplasmic side of late<br>Endosome membrane                                                                                                      | [EDST].{0,2}[WFY].<br>[ILV]                                                                             |
| TRG_ENDOCYTIC_2    | 20-23<br>168-171<br>184-187                                | Tyrosine-based sorting signal responsible for the interaction with mu subunit of AP (Adaptor Protein) complex                                      | Plasma membrane,<br>Clathrin-coated endocytic vesicle, cytosol                                                                                                 | Y.[LMVIF]                                                                                               |
| MOD_NEK2_1         | 25-30<br>72-77<br>169-174                                  | NEK2 phosphorylation motif with preferred Phe, Leu or Met in the -3 position to compensate for less favourable residues in the +1 and +2 position. | Nucleus,<br>Cytosol,<br>Centrosome,<br>Ndc80 complex,<br>Condensed nuclear chromosome outer<br>Kinetochores                                                    | [FLM][^P][^P](ST)<br>[^DEP][^DE]                                                                        |
| LIG_14-3-3_CanoR_1 | 29-39                                                      | Canonical Arg-containing phospho-motif mediating a strong interaction with 14-3-3 proteins.                                                        | Nucleus,<br>Internal side of plasma membrane,<br>Cytosol                                                                                                       | R[^DE]{0,2}[^DEPG]<br>(ST)([FWYLMV]).<br>([^PRIKGN]P)<br>([^PRIKGN]{2,4}<br>[VILMFWY])<br>..(ST)...[ST] |
| MOD_GSK3_1         | 30-37                                                      | GSK3 phosphorylation recognition site                                                                                                              | Cytosol,<br>Nucleus                                                                                                                                            | .[^IRFW](ST)<br>[ILMVFWY]<br>[ILMVFWY].                                                                 |
| MOD_Plk_4          | 31-37<br>84-90                                             | Ser/Thr residue phosphorylated by Plk4                                                                                                             | Cytosol,<br>SCF ubiquitin ligase complex,<br>Cleavage furrow,<br>Centriole,<br>Gamma-tubulin ring complex, centriolar<br>Satellite,<br>Pericentriolar material |                                                                                                         |
| MOD_CK1_1          | 34-40<br>87-93                                             | CK1 phosphorylation site                                                                                                                           | Cytosol,<br>Nucleus                                                                                                                                            | S..(ST)...                                                                                              |

Table S1. Continued.

| EIm name            | Positions                   | EIm description                                                                                                                                                                                                                                      | Cell compartment                                                                                                                                                                                                                                   | Pattern                                                                                           |
|---------------------|-----------------------------|------------------------------------------------------------------------------------------------------------------------------------------------------------------------------------------------------------------------------------------------------|----------------------------------------------------------------------------------------------------------------------------------------------------------------------------------------------------------------------------------------------------|---------------------------------------------------------------------------------------------------|
| LIG_PTB_Apo_2       | 38-45                       | These phosphorylation-independent motifs bind to Dab-like PTB domains. Binding is not driven by contacts at the O or FY position, but instead is dependent upon the large number of hydrophobic and hydrogen bond contacts between motif and domain. | Integrin,<br>Internal side of plasma membrane,<br>Cytosol,<br>Receptor complex,<br>Cytoplasmic membrane-bounded vesicle                                                                                                                            | ([ <sup>^</sup> P].NP.[FY].)<br> {.}[ILV]MFY N..[FY].)                                            |
| DOC_WW_Pin1_4       | 46-51                       | The Class IV WW domain interaction motif is recognised primarily by the Pin1 phosphorylation-dependent prolyl isomerase.                                                                                                                             | Nucleus,                                                                                                                                                                                                                                           | ...([ST])P.                                                                                       |
| MOD_ProDKin_1       | 46-52                       | Proline-Directed Kinase (e.g. MAPK) phosphorylation site in higher eukaryotes.                                                                                                                                                                       | Cytosol,<br>Nucleus                                                                                                                                                                                                                                | ...([ST])P..                                                                                      |
| DOC_CKSI_1          | 47-52                       | Phospho-dependent motif that mediates docking of CDK substrates and regulators to cyclin-CDK-bound Cks1.                                                                                                                                             | Cytosol,<br>Nucleus                                                                                                                                                                                                                                | [MPVLIFWYQ].(T)P..                                                                                |
| LIG_FHA_1           | 47-53                       | Phosphothreonine motif binding a subset of FHA domains that show a preference for a large aliphatic amino acid at the pT+3 position.                                                                                                                 | Nucleus                                                                                                                                                                                                                                            | ..(T)..[ILV].                                                                                     |
| LIG_SH2_STAT5       | 48-51<br>168-171<br>184-187 | STAT5 Src Homology 2 domain binding motif.                                                                                                                                                                                                           | Cytosol                                                                                                                                                                                                                                            | (Y)[VLTFC]..                                                                                      |
| LIG_FHA_2           | 49-55<br>152-158<br>175-181 | Phosphothreonine motif binding a subset of FHA domains that prefer an acidic amino acid at the pT+3 position.                                                                                                                                        | Nucleus,<br>Replication fork                                                                                                                                                                                                                       | ..(T)..[DE].                                                                                      |
| LIG_WD40_WDR5_VDV_1 | 65-71                       | This WDR5-binding motif binds to a cleft between blades 5 and 6 of the WD40 repeat domain of WDR5, opposite of the Win motif-binding site, to mediate assembly of histone modification complexes.                                                    | Nucleus,<br>Histone methyltransferase complex                                                                                                                                                                                                      | [ED].{0,3}[VIL]D[VI]                                                                              |
| TRG_ER_diArg_1      | 83-85<br>84-86              | The di-Arg ER retention motif is defined by two consecutive arginine residues or with a single residue insertion. The motif is completed by an adjacent hydrophobic/arginine residue which may be on either side of the Arg pair.                    | Endoplasmic reticulum membrane,<br>Integral protein,<br>ER-Golgi transport vesicle membrane,<br>Endoplasmic reticulum membrane,<br>Golgi-ER transport vesicle membrane,<br>Rough endoplasmic reticulum,<br>Endoplasmic reticulum cisterna, cytosol | ([LIV]MFYWPR]<br>R[ <sup>^</sup> YFWDE]<br>{0,1}R)(R[ <sup>^</sup> YFWDE]<br>{0,1}R [LIV]MFYWPR]) |
| MOD_PK_1            | 84-90                       | Phosphorylase kinase phosphorylation site                                                                                                                                                                                                            | Cytosol                                                                                                                                                                                                                                            | [RK]..(S)[VI]..                                                                                   |
| MOD_PKA_2           | 84-90<br>102-108            | Secondary preference for PKA-type AGC kinase phosphorylation.                                                                                                                                                                                        | Cytosol,<br>Nucleus,<br>cAMP-dependent protein kinase complex                                                                                                                                                                                      | ..R..([ST])[ <sup>^</sup> P]..                                                                    |
| MOD_PKA_1           | 84-90<br>174-180            | Main preference for PKA-type AGC kinase phosphorylation.                                                                                                                                                                                             | cAMP-dependent protein kinase complex,<br>Cytosol,<br>Nucleus                                                                                                                                                                                      | [RK] RK .([ST])[ <sup>^</sup> P]..                                                                |

Table SI. Continued.

| Elm name             | Positions                     | Elm description                                                                                                                                                                                                                                             | Cell compartment                                   | Pattern                                                                                                      |
|----------------------|-------------------------------|-------------------------------------------------------------------------------------------------------------------------------------------------------------------------------------------------------------------------------------------------------------|----------------------------------------------------|--------------------------------------------------------------------------------------------------------------|
| TRG_LysEnd_APsAcLL_1 | 92-97<br>155-160              | Sorting and internalisation signal found in the cytoplasmic juxta-membrane region of type I transmembrane proteins. Targets them from the Trans Golgi Network to the lysosomal-endosomal-melanosomal compartments. Interacts with adaptor protein complexes | Cytosol,<br>Endocytic vesicle                      | [DERQ]...L[LV]                                                                                               |
| LIG_Pex14_2          | 94-98<br>183-187              | Fxxx[WF] motifs are present in Pex19 and <i>S. cerevisiae</i> Pex5 cytosolic receptors that bind to peroxisomal membrane docking member, Pex14                                                                                                              | Cytosol,<br>Peroxisome,<br>Glycosome               | F...[WF]                                                                                                     |
| MOD_CK2_1            | 102-108<br>151-157<br>158-164 | CK2 phosphorylation site                                                                                                                                                                                                                                    | Nucleus,<br>Cytosol,<br>Protein kinase CK2 complex | ...(ST)..E                                                                                                   |
| MOD_SUMO_rev_2       | 104-112<br>105-112<br>107-112 | Inverted version of SUMOylation motif recognized for modification by SUMO-1                                                                                                                                                                                 | PML body,<br>Nucleus                               | [SDE]{0,5}[DE].(K).<br>{0,1}[AIFLMPSTV]                                                                      |
| DOC_MAPK_gen_1       | 110-119<br>111-119            | MAPK interacting molecules (e.g. MAPKKs, substrates, phosphatases) carry docking motif that help to regulate specific interaction in the MAPK cascade. The classic motif approximates (R/K)xxxx#x# where # is a hydrophobic residue.                        | Nucleus,<br>Cytosol                                | [KR]{0,2}[KR].{0,2}<br>[KR].{2,4}[ILVM].<br>[ILVF]                                                           |
| DOC_USP7_UBL2_3      | 110-114<br>120-124<br>124-128 | The USP7 CTD domain binding motif variant based on the ICP0 and DNMT1 interactions                                                                                                                                                                          | Nucleus                                            | K...K                                                                                                        |
| LIG_SUMO_SIM_par_1   | 115-121                       | Motif for the parallel beta augmentation mode of non-covalent binding to SUMO protein.                                                                                                                                                                      | PML body,<br>Nucleus,<br>Nuclear body              | [DEST]{0,5}.<br>[VILPTM][VIL]<br>[DESTVILMA][VIL].<br>{0,1}[DEST]{1,10}<br>[ILM][ILMF].{1,2}<br>[ILM].{0,4}K |
| LIG_UBA3_1           | 182-191<br>186-191            | UBA3 adenylation domain binding motif variant based on the UBE2M and UBE2F interactions.                                                                                                                                                                    | Nucleus                                            |                                                                                                              |

Table SI. Continued.

| Elm motif name     | Instances (Matched Sequence) | Positions                     | Elm description                                                                                                                                                                                                                   | Cell compartment                                                                                                                                                                                                                                   | Pattern                                                                                            | E-value                 |
|--------------------|------------------------------|-------------------------------|-----------------------------------------------------------------------------------------------------------------------------------------------------------------------------------------------------------------------------------|----------------------------------------------------------------------------------------------------------------------------------------------------------------------------------------------------------------------------------------------------|----------------------------------------------------------------------------------------------------|-------------------------|
| DOC_WW_Pin1_4      | HEMSPA<br>GMVSPF             | 194-199<br>229-234            | The Class IV WW domain interaction motif is recognised primarily by the Pin1 phosphorylation-dependent prolyl isomerase.                                                                                                          | Nucleus,<br>Cytosol                                                                                                                                                                                                                                | ...(ST)P.                                                                                          | 1.543x10 <sup>-02</sup> |
| MOD_ProDKin_1      | HEMSPAL<br>GMVSPFA           | 194-200<br>229-235            | Proline-Directed Kinase (e.g. MAPK) phosphorylation site in higher eukaryotes.                                                                                                                                                    | Cytosol,<br>Nucleus                                                                                                                                                                                                                                | ...                                                                                                | 1.543x10 <sup>-02</sup> |
| LIG_14-3-3_CanoR_1 | RKISVQ                       | 202-207                       | Canonical Arg-containing phospho-motif mediating a strong interaction with 14-3-3 proteins.                                                                                                                                       | Nucleus,<br>Internal side of plasma membrane,<br>Cytosol                                                                                                                                                                                           | R[^A]DE[0,2][^A]DEPG[0,1]([FWYLMV])([^A]PRIKGN[IP])([^A]PRIKGN){2,4}[VILMFWYPI])<br>[RK].(S)[VI].. | 4.477x10 <sup>-03</sup> |
| MOD_PK_1           | RKISVQY<br>RRPSVNS           | 202-208<br>236-242            | Phosphorylase kinase phosphorylation site                                                                                                                                                                                         | Cytosol                                                                                                                                                                                                                                            | ...                                                                                                | 9.418x10 <sup>-04</sup> |
| MOD_PKA_1          | RKISVQY<br>RRPSVNS           | 202-208<br>236-242            | Main preference for PKA-type AGC kinase phosphorylation.                                                                                                                                                                          | cAMP-dependent protein kinase<br>Complex,<br>Cytosol, nucleus                                                                                                                                                                                      | [RK][RK].(ST)[^A]P]..                                                                              | 2.315x10 <sup>-03</sup> |
| TRG_ER_diArg_1     | MRR<br>RRV<br>RRP            | 219-221<br>220-222<br>236-238 | The di-Arg ER retention motif is defined by two consecutive arginine residues or with a single residue insertion. The motif is completed by an adjacent hydrophobic/arginine residue which may be on either side of the Arg pair. | Endoplasmic reticulum membrane,<br>Integral protein,<br>ER-Golgi transport vesicle membrane,<br>Endoplasmic reticulum membrane,<br>Golgi-ER transport vesicle membrane,<br>Rough endoplasmic reticulum,<br>Endoplasmic reticulum cisterna, cytosol | (LIVMFYWPR]<br>R[^A]YFWDE[0,1}R)<br>R[^A]YFWDE[0,1}<br>R[LIVMFYWPR]                                | 5.369x10 <sup>-03</sup> |
| LIG_LIR_Gen_1      | DAYGMV                       | 226-231                       | Canonical LIR motif that binds to Atg8 protein family members to mediate processes involved in autophagy.                                                                                                                         | Cytosol,<br>Cytoplasmic side of late endosome<br>Membrane                                                                                                                                                                                          | [EDST]{0,2}[WFY].-[ILV]                                                                            | 5.200x10 <sup>-03</sup> |
| TRG_ENDOCYTIC_2    | YGMV                         | 228-231                       | Tyrosine-based sorting signal responsible for the interaction with mu subunit of Adaptor Protein complex                                                                                                                          | Plasma membrane,<br>Clathrin-coated endocytic vesicle,<br>Cytosol                                                                                                                                                                                  | Y.[LMVIF]                                                                                          | 2.587x10 <sup>-03</sup> |
| MOD_CDK_SPxxK_3    | GMVSPFAR                     | 229-236                       | Longer version of the CDK phosphorylation site which shows specificity towards a lysine/arginine residue at position +4 after the phospho-Ser/Thr                                                                                 | Cycloplasmic cyclin-dependent protein<br>Kinase holoenzyme complex,<br>Origin recognition complex,<br>Spindle,<br>Microtubule,<br>Cytosol,<br>Nucleus                                                                                              | ...(ST)P.[RK]                                                                                      | 1.929x10 <sup>-03</sup> |

Table SI. Continued.

| Elm motif name  | Instances (Matched Sequence) | Positions | Elm description                                                                                                                                                                                                                         | Cell compartment                                        | Pattern                                                                    | E-value                 |
|-----------------|------------------------------|-----------|-----------------------------------------------------------------------------------------------------------------------------------------------------------------------------------------------------------------------------------------|---------------------------------------------------------|----------------------------------------------------------------------------|-------------------------|
| MOD_PKA_2       | RRPSVNS                      | 236-242   | Secondary preference for PKA-type AGC kinase phosphorylation.                                                                                                                                                                           | Cytosol, Nucleus, cAMP-dependent protein kinase Complex | .R.(^ST) ^P ..                                                             | 9.458x10 <sup>-03</sup> |
| MOD_CK1_1       | SVNSDLK                      | 239-245   | CK1 phosphorylation site                                                                                                                                                                                                                | Cytosol, Nucleus                                        | S.(^ST)...                                                                 | 1.704x10 <sup>-02</sup> |
| MOD_SUMO_rev_2  | SVNSDLKYI                    | 239-247   | Inverted version of SUMOylation motif                                                                                                                                                                                                   | PML body, Nucleus                                       | [SDE]{0,5}[DE](K){0,1}                                                     | 1.280x10 <sup>-02</sup> |
| LIG_Actin_WH2_2 | SDLKYI                       | 242-247   | recognized for modification by SUMO-1                                                                                                                                                                                                   | Nucleus                                                 | [AIFLMPSTV]                                                                | 6.603x10 <sup>-04</sup> |
|                 | VNSDLKYIK<br>AKVLREG         | 240-255   | The WH2 motif is of variable length (16-19 amino acids) binding to the hydrophobic cleft formed by actin's subdomains 1 and 3. At the N-terminus it forms an $\alpha$ -helix followed by a flexible loop stabilised upon actin binding. | Cytosol                                                 | [^R].(^[ILMVV]) ([ILMVV])<br>[^P] ^P ([LVM]){4,7}L([IKR]) <br>(NK) VATIGS] |                         |
| LIG_SH2_STAT5   | YIKA                         | 246-249   | STAT5 Src Homology 2 domain binding motif.                                                                                                                                                                                              | Cytosol                                                 | (Y) VLTFC ..                                                               | 3.296x10 <sup>-03</sup> |
| MOD_CAAAXbox    | CTIQ                         | 263-266   | Generic CAAAX box phosphorylation motif                                                                                                                                                                                                 | Cytosol                                                 | (C) ^DENQ LIVMF .\$                                                        | 2.446x10 <sup>-06</sup> |
